# Supplementary material for: Orange/cyan emissive sensors of Sb3+ for probing water via reversible phase transformation in rare-earth-based perovskite crystals
Source: Royal Society of Chemistry journal article supplement (doi:10.1039/d2qi02221d), 2022-12-06
Supplement: d2qi02221d1.pdf [file d2qi02221d1.pdf]

## Supporting Information

### Orange/Cyan Emissive Sensors of Sb<sup>3+</sup> for Probing Water via Reversible Phase Transformation in Rare-Earth-Based Perovskite Crystals

Yexin Huang,<sup>a</sup> Yuexiao Pan,<sup>a\*</sup> Chengdong Peng,<sup>a</sup> Yihong Ding,<sup>a</sup> Hongzhou Lian,<sup>b</sup> Liyi Li,<sup>c\*</sup> and Jun Lin<sup>b\*</sup>

<sup>a</sup>Key Laboratory of Carbon Materials of Zhejiang Province, College of Chemistry and Materials Engineering, Wenzhou University, Wenzhou 325035, P. R. China.

<sup>b</sup>State Key Laboratory of Rare Earth Resource Utilization, Changchun Institute of Applied Chemistry, Chinese Academy of Sciences, Changchun 130022, P. R. China.

<sup>c</sup>Innovative Drug and Imaging Agent R&D Center, Research Institute of Qsinghua, Pearl River Delta, Guangzhou, P. R. China.

## 2. Experimental

### 2.5. Characterization

The single-crystal X-ray diffraction data were collected using a SMART APE II DUO X-ray four-circle single-crystal diffractometer (Bruker) equipped with a CCD-detector, a graphite monochromator, and a Cu K radiation source. The powder X-ray diffraction (PXRD) patterns of the crystals were collected on a Bruker (Karlsruhe, Germany) D8 Advance XRD with graphite monochromatized Cu K $\alpha$  radiation ( $\lambda = 0.15418$  nm) in the two degrees range from 10-80°. High-resolution transmission electron microscopy (HRTEM) observation was performed by using a JEOL 2100F high-resolution transmission electron microscope using an accelerating voltage of 200 kV with an attached energy-dispersive x-ray energy dispersive spectrum spectrometer (EDS). The chemical composition on the surface of the particles was analyzed by using x-ray photoelectron spectra (XPS) conducted on a ESCALAB 250Xi versa

probe spectrometer (analyzer resolution  $\leq 0.5$  eV) with a monochromatic of Al  $K\alpha$  radiation ( $h\nu = 486.6$  eV). The photoluminescence (PL) excitation and PL emission spectra were recorded on a FluoroMAX-4-TCSPC fluorescence spectrophotometer (Horiba Jobin Yvon Inc). The PL decay curves were recorded on an FLS980 spectrometer (Edinburgh).

## 2.6. Computational Methodology

The first-principles density functional theory (DFT) computation was implemented by Vienna Ab initio Simulation Package (VASP).<sup>1</sup> Generalized gradient approximation (GGA) in the Perdew Burke Ernzerhof (PBE) form was employed for the exchange-correlation functional energies.<sup>2</sup> The cut-off energy was set at 350 eV for the plane wave basis set. For undoped samples, a  $2 \times 2 \times 2$  G-centered mesh was selected for Brillouin-zone K-point sampling in the unit cell. For  $Sb^{3+}$ -doped samples, a  $1 \times 1 \times 1$  G-centered mesh was used in the supercell (i.e.,  $2 \times 2 \times 1$  primitive cells). The energy of the system and forces on each atom were converged to  $10^{-5}$  eV and  $0.003$  eV/Å.

- 1 G. Kresse and J. Furthmüller, Efficient iterative schemes for ab initio total-energy calculations using a plane-wave basis set, *Phys. Rev. B* 1996, **54**, 11169.
- 2 M. Ernzerhof and G. E. Scuseria, Assessment of the Perdew-Burke-Ernzerhof exchange-correlation functional, *J. Chem. Phys.*, 1999, **110**, 5029-5036.

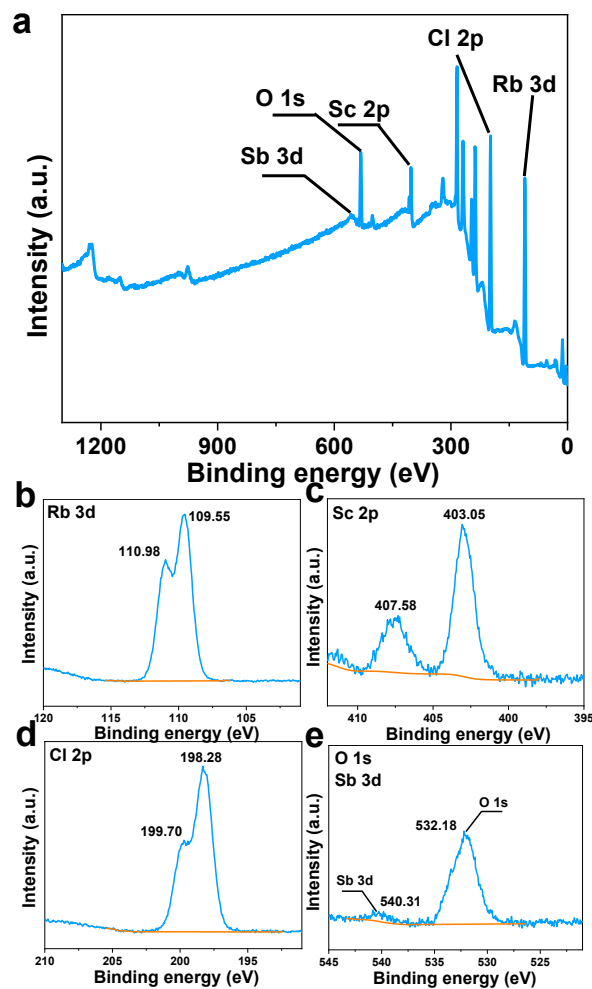

**Fig. S1** (a) XPS full spectrum of  $\text{Rb}_2\text{ScCl}_5 \cdot \text{H}_2\text{O} : \text{Sb}^{3+}$ , (b-e) XPS spectra of the elements Rb, Sc, Cl, O, and Sb in  $\text{Rb}_2\text{ScCl}_5 \cdot \text{H}_2\text{O} : \text{Sb}^{3+}$ .

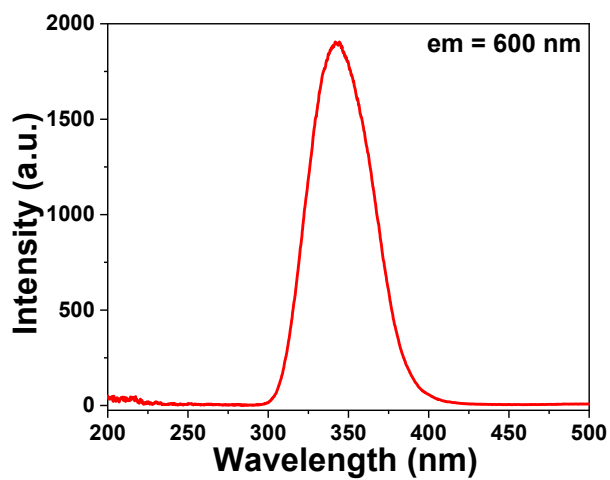

**Fig. S2** Full PL excitation spectrum ( $\lambda_{\text{em}} = 600 \text{ nm}$ ) of  $\text{Rb}_2\text{ScCl}_5 \cdot \text{H}_2\text{O} : \text{Sb}^{3+}$ .

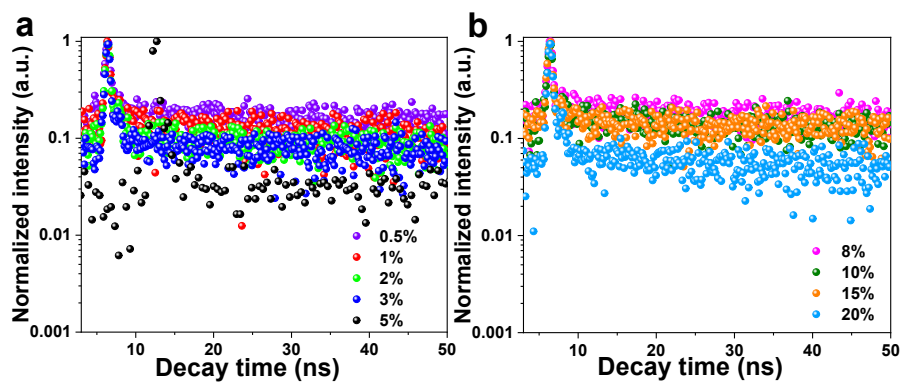

Fig. S3 (a, b) PL decay curves of  $\text{Rb}_2\text{ScCl}_5 \cdot \text{H}_2\text{O} : x\% \text{Sb}^{3+}$  with  $\text{Sb}^{3+}$  content increasing.

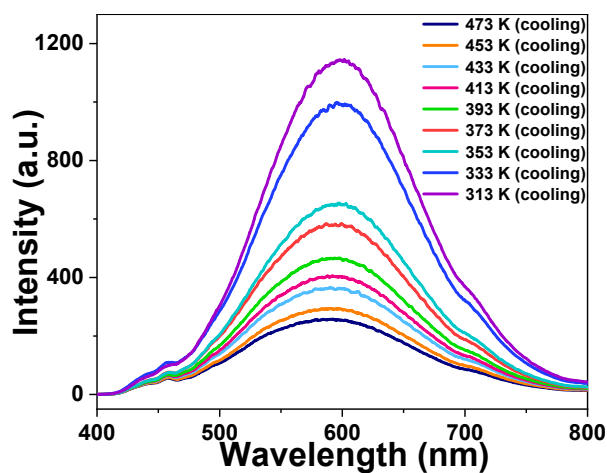

Fig. S4 Temperature-dependent PL emission spectra of  $\text{Rb}_2\text{ScCl}_5 \cdot \text{H}_2\text{O} : \text{Sb}^{3+}$  during the cooling cycle.

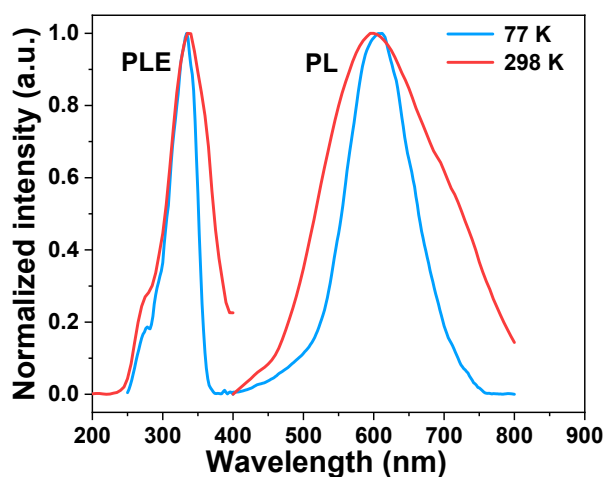

Fig. S5 Normalized PL excitation ( $\lambda_{\text{em}} = 600 \text{ nm}$ ) and emission spectra ( $\lambda_{\text{ex}} = 340 \text{ nm}$ ) of  $\text{Rb}_2\text{ScCl}_5 \cdot \text{H}_2\text{O} : \text{Sb}^{3+}$  at 77 K (blue line) and 298 K (red line).

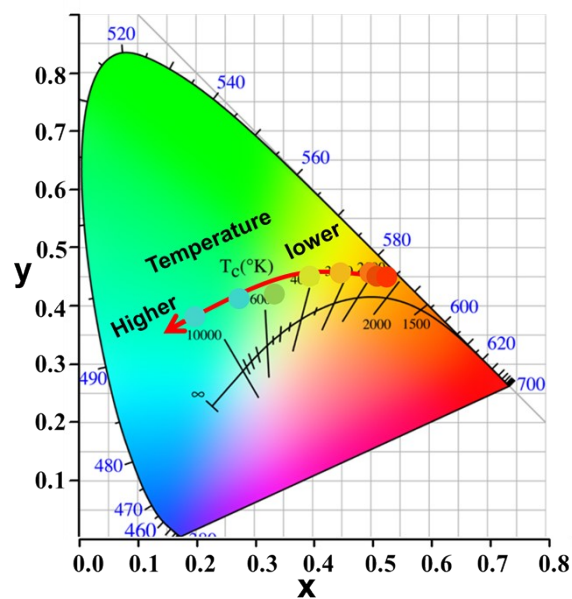

**Fig. S6** CIE chromaticity coordinates of  $\text{Rb}_2\text{ScCl}_5 \cdot \text{H}_2\text{O} : \text{Sb}^{3+}$  after treatment at different temperatures.

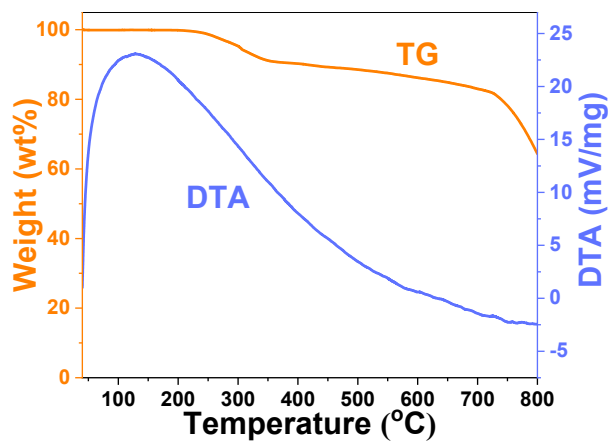

**Fig. S7** Thermogravimetry/differential thermal analysis (TG-DTA) curves of  $\text{Rb}_2\text{ScCl}_5 \cdot \text{H}_2\text{O} : \text{Sb}^{3+}$  measured on Netzsch STA 449 C at a heating rate of  $10 \text{ K min}^{-1}$ .

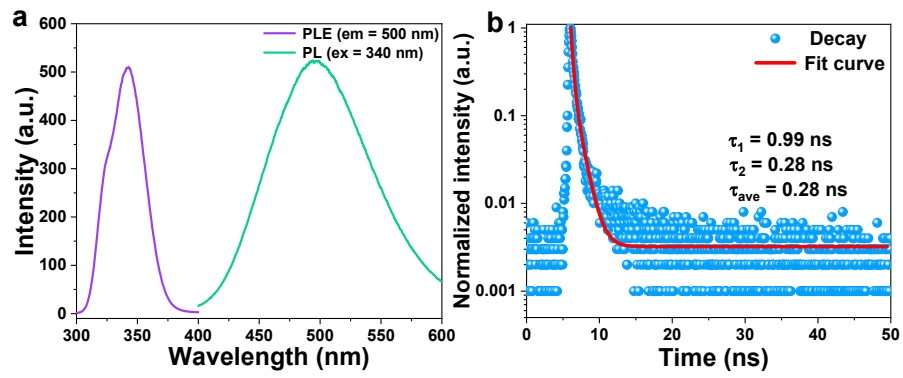

**Fig. S8** (a) PL excitation ( $\lambda_{\text{em}} = 500 \text{ nm}$ ) and emission spectra ( $\lambda_{\text{ex}} = 340 \text{ nm}$ ) of  $\text{Rb}_3\text{ScCl}_6:\text{Sb}^{3+}$ , (b) PL decay curve of  $\text{Rb}_3\text{ScCl}_6:\text{Sb}^{3+}$ .

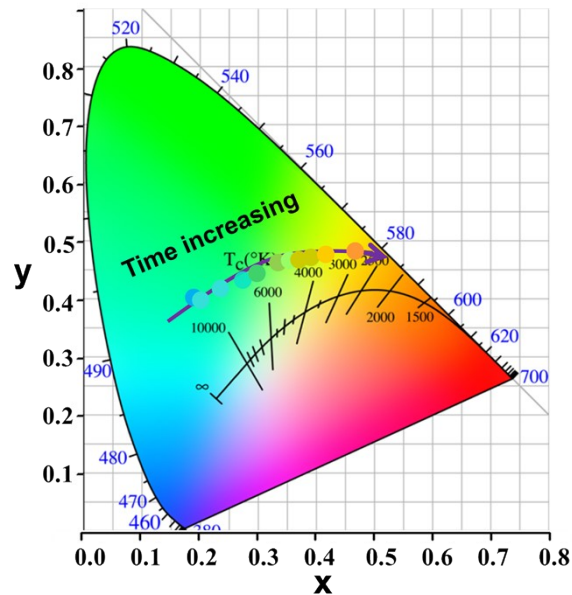

**Fig. S9** CIE chromaticity coordinates of  $\text{Rb}_3\text{ScCl}_6:\text{Sb}^{3+}$  with aging time between 1-60 min (finally become to be  $\text{Rb}_2\text{ScCl}_5 \cdot \text{H}_2\text{O}:\text{Sb}^{3+}$ ).

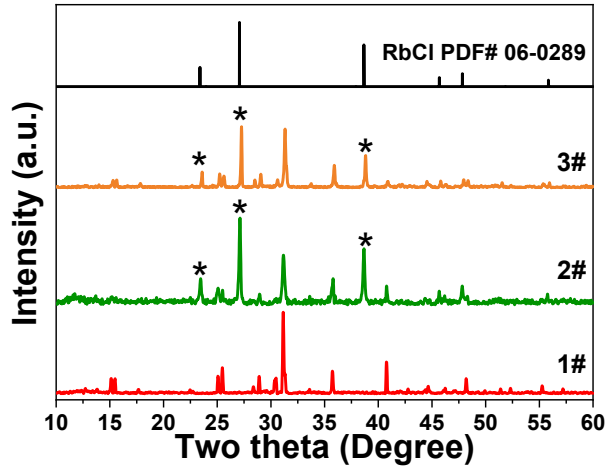

**Fig. S10** XRD patterns of (1#) original  $\text{Rb}_2\text{ScCl}_5 \cdot \text{H}_2\text{O}:\text{Sb}^{3+}$ , and the  $\text{Rb}_3\text{ScCl}_6:\text{Sb}^{3+}$  (2#) exposed in air for 1 h and (3#) treated with 2 mL hydrochloric acid for 3 s.

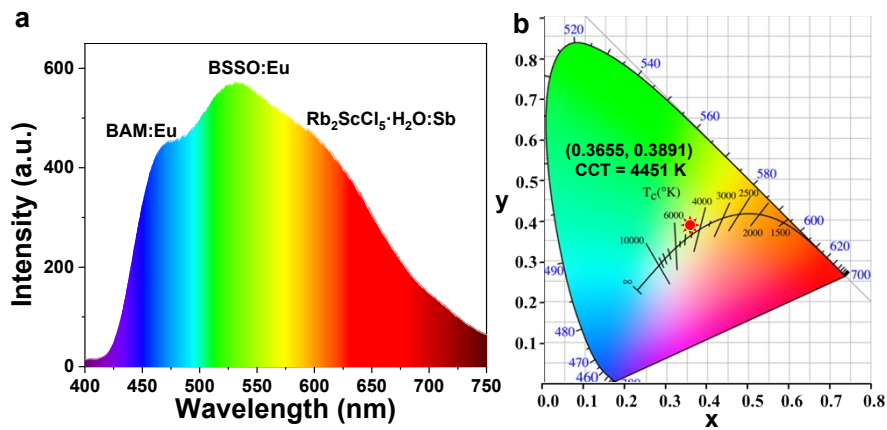

**Fig. S11** (a) Electroluminescence (EL) spectrum of the WLED based on  $\text{Rb}_2\text{ScCl}_5 \cdot \text{H}_2\text{O}:\text{Sb}^{3+}$  at 40 mA drive current, (b) CIE color coordinates of the WLED in operation.

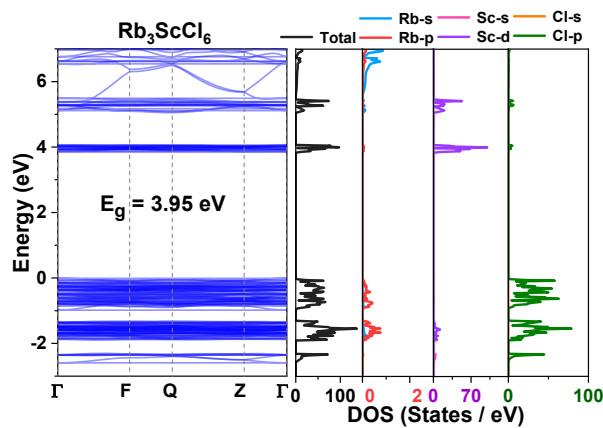

**Fig. S12** Calculated electronic band structure (left) and DOS (right) of  $\text{Rb}_3\text{ScCl}_6$  crystal.

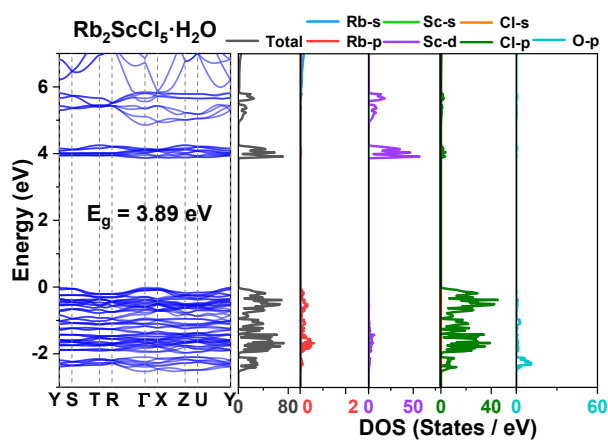

**Fig. S13** Calculated electronic band structure (left) and DOS (right) of  $\text{Rb}_2\text{ScCl}_5 \cdot \text{H}_2\text{O}$  crystal.

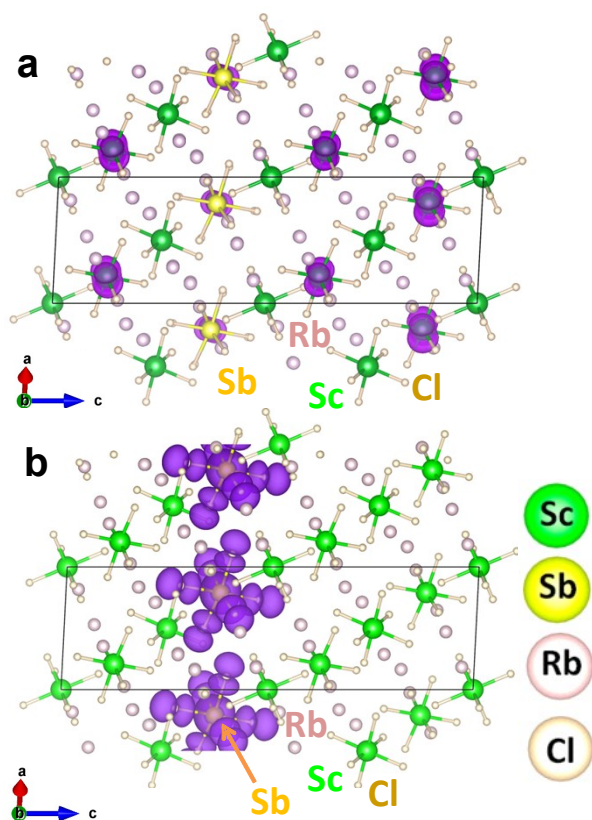

**Fig. S14** (a) The conduction band minimum (CBM) and (b) the valence band maximum (VBM)

associated charge densities of  $\text{Rb}_3\text{ScCl}_6:\text{Sb}^{3+}$  crystal.



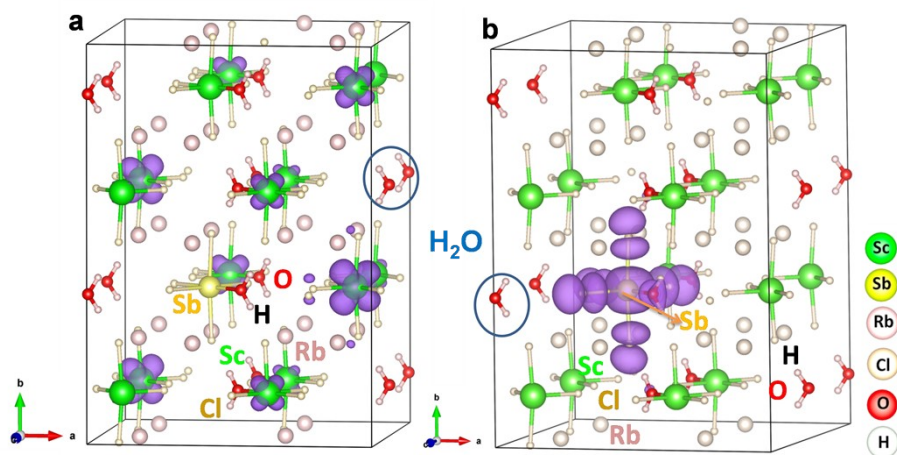

**Fig. S15** (a) The conduction band minimum (CBM) and (b) the valence band maximum (VBM)

associated charge densities of  $\text{Rb}_2\text{ScCl}_5 \cdot \text{H}_2\text{O} : \text{Sb}^{3+}$  crystal.

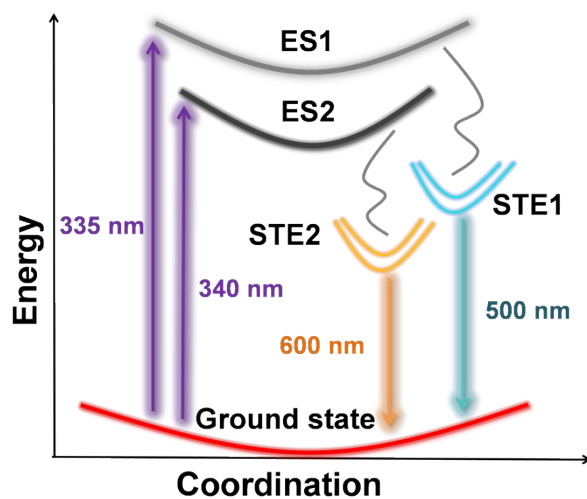

**Fig. S16** Schematic illustration of the STE emission in  $\text{Sb}^{3+}$  doped  $\text{Rb}_2\text{ScCl}_5 \cdot \text{H}_2\text{O}$  (600 nm) and  $\text{Rb}_3\text{ScCl}_6$  (500 nm).

**Table S1** Single crystal X-ray diffraction data of  $\text{Rb}_2\text{ScCl}_5 \cdot \text{H}_2\text{O}$  single crystals.

|                                           |                                                     |
|-------------------------------------------|-----------------------------------------------------|
| Compound                                  | $\text{Rb}_2\text{ScCl}_5 \cdot \text{H}_2\text{O}$ |
| Formula weight                            | 182.89g/mol                                         |
| Temperature                               | 298 K                                               |
| Crystal system                            | Orthorhombic                                        |
| Space group                               | <i>Pnma</i>                                         |
| a/Å                                       | 14.003                                              |
| b/Å                                       | 10.045                                              |
| c/Å                                       | 7.246                                               |
| $\alpha/^\circ$                           | 90                                                  |
| $\beta/^\circ$                            | 90                                                  |
| $\gamma/^\circ$                           | 90                                                  |
| Volume/Å <sup>3</sup>                     | 1019.23                                             |
| $\rho_{\text{cal}}$                       | 2.979                                               |
| F(000)                                    | 840                                                 |
| Limiting indices                          | $-16 \leq h \leq 15$                                |
|                                           | $-11 \leq k \leq 10$                                |
|                                           | $-8 \leq l \leq 8$                                  |
| $\theta$ range/deg                        | 2.91 to 25.00                                       |
| Reflections collected                     | 4199                                                |
| Independent reflections                   | 841[R(int) = 0.0303]                                |
| Absorption coefficient / mm <sup>-1</sup> | 0.0108                                              |
| Data / restraints / parameters            | 951/3/56                                            |
| Goodness-of-fit on F <sup>2</sup>         | 1.041                                               |
| Final R indices [I > 2 $\sigma$ (I)]      | R1 = 0.0202                                         |
|                                           | wR2 = 0.0610                                        |
| R indices (all data)                      | R1 = 0.0245                                         |
|                                           | wR2 = 0.0627                                        |

$$R1 = \sum(|F_o| - |F_c|) / \sum|F_o|; wR2 = \{ \sum[w(F_o^2 - F_c^2)^2] / \sum[w(F_o^2)]^2 \}^{1/2}$$

**Table S2** Comparison of Bond Length and Angles of  $[\text{ScCl}_5\text{H}_2\text{O}]^{2-}$  in  $\text{Rb}_2\text{ScCl}_5 \cdot \text{H}_2\text{O}$  and  $\text{Cs}_2\text{ScCl}_5 \cdot \text{H}_2\text{O}$ .<sup>24</sup>

|                                                     | Bond Length(Å) |            | Angle (deg) |            |
|-----------------------------------------------------|----------------|------------|-------------|------------|
| $\text{Rb}_2\text{ScCl}_5 \cdot \text{H}_2\text{O}$ | Sc-Cl(1)       | 2.4873(15) | Cl-Sc-Cl    | 93.412(3)  |
|                                                     | Sc-Cl(2)       | 2.4702(8)  |             |            |
|                                                     | Sc-Cl(3)       | 2.4702(9)  |             |            |
|                                                     | Sc-Cl(4)       | 2.4590(15) |             |            |
|                                                     | Sc-Cl(5)       | 2.4510(14) |             |            |
|                                                     | Sc-O           | 2.1710(3)  | Cl-Sc-O     | 86.591(3)  |
| $\text{Cs}_2\text{ScCl}_5 \cdot \text{H}_2\text{O}$ | Sc-Cl(1)       | 2.4822(8)  | Cl-Sc-Cl    | 94.502(17) |
|                                                     | Sc-Cl(2)       | 2.4845(5)  |             |            |
|                                                     | Sc-Cl(3)       | 2.4845(5)  |             |            |
|                                                     | Sc-Cl(4)       | 2.4589(9)  |             |            |
|                                                     | Sc-Cl(5)       | 2.4593(8)  |             |            |
|                                                     | Sc-O           | 2.1793(3)  | Cl-Sc-O     | 85.498(17) |

**Table S3** The decay of  $\text{Rb}_2\text{ScCl}_5 \cdot \text{H}_2\text{O} : x\% \text{Sb}^{3+}$  ( $x = 0.5, 1, 2, 3, 5, 8, 10, 15, 20$ ).

| Concentration<br>( $\text{Sb}^{3+}/\text{mol}\%$ ) | 0.5  | 1    | 2    | 3    | 5    | 8    | 10   | 15   | 20   |
|----------------------------------------------------|------|------|------|------|------|------|------|------|------|
| Decay (ns)                                         | 1.06 | 0.49 | 0.48 | 0.45 | 0.44 | 0.38 | 0.37 | 0.36 | 0.34 |

**Table S4** Comparison of optical properties of Sb-doped  $A_2BX_5 \cdot H_2O$  ( $A = Cs, Rb, B = In, Sc$  and  $X = Cl, Br$ ) and  $A_3BX_6$  ( $A = Cs, Rb, B = In, Sc$  and  $X = Cl, Br$ ).

| Perovskites                     | PLE<br>(nm) | PL<br>(nm) | PLQY<br>(%)   | FWHM<br>(nm) | Year      | Reference |
|---------------------------------|-------------|------------|---------------|--------------|-----------|-----------|
| $Cs_2InBr_5 \cdot H_2O$         | 355         | 695        | 33            | /            | 2019      | 4         |
| $Cs_2InCl_5 \cdot H_2O:Sb^{3+}$ | /           | 560        | 90            | /            | 2020      | 38        |
| $Rb_2InCl_5 \cdot H_2O:Sb^{3+}$ | /           | 600        | 90            | /            |           |           |
| $Cs_3InCl_6:Sb^{3+}$            | /           | 507        | 85            | /            |           |           |
| $Rb_3InCl_6:Sb^{3+}$            | /           | 497        | 95            | /            |           |           |
| $Cs_2InCl_5 \cdot H_2O:Sb^{3+}$ | 344         | 610        | 73            | 164          | 2020      | 22        |
| $Cs_2InBr_5 \cdot H_2O:Sb^{3+}$ | 357         | 692        | 33            | 207          |           |           |
| $Rb_2InCl_5 \cdot H_2O:Sb^{3+}$ | 310         | 678        | 51            | 211          |           |           |
| $Rb_2InBr_5 \cdot H_2O:Sb^{3+}$ | 395         | 766        | 18            | 160          |           |           |
| $Rb_3InCl_6:Sb^{3+}$            | 280         | 522        | /             | 129          | 2020      | 5         |
| $Cs_2InCl_5 \cdot H_2O:Sb^{3+}$ | 340         | 580        | 95            | /            | 2020      | 12        |
| $Cs_2InBr_5 \cdot H_2O:Sb^{3+}$ | 354         | 630        | 13            | /            |           |           |
| $Cs_2InCl_5 \cdot H_2O:Sb^{3+}$ | 325         | 596        | 75            | /            | 2022      | 13        |
| $Cs_3InCl_6:Sb^{3+}$            | 322         | 512        | 52            | /            |           |           |
| $Cs_2ScCl_5 \cdot H_2O$         | 250         | 490        | 25            | 158          | 2022      | 24        |
|                                 | 280         | 565        | 2             | /            |           |           |
|                                 | 310         | 585        | 1             | 155          |           |           |
| $Cs_2ScCl_5 \cdot H_2O:Sb^{3+}$ | 310         | 585        | $\approx 100$ | /            |           |           |
| $Rb_2ScCl_5 \cdot H_2O$         | /           | /          | /             | /            | This work |           |
| $Rb_2ScCl_5 \cdot H_2O:Sb^{3+}$ | 340         | 600        | 99            | 141          |           |           |
| $Rb_3ScCl_6:Sb^{3+}$            | 340         | 500        | 96            | 102          |           |           |
